# Supplementary material for: Hollow core–shell NiCo2S4@MoS2 dodecahedrons with enhanced performance for supercapacitors and hydrogen evolution reaction
Source: Royal Society of Chemistry journal article supplement (doi:10.1039/c8nj05814h), 2019-01-01
Supplement: c8nj05814h1.pdf [file c8nj05814h1.pdf]

## Electronic Supplementary Information

Hollow core-shell NiCo<sub>2</sub>S<sub>4</sub>@MoS<sub>2</sub> dodecahedrons with enhanced performance for supercapacitors and hydrogen evolution reaction

Xue-Zhi Song, Fei-Fei Sun, Yu-Lan Meng, Zi-Wei Wang, Qiao-Feng Su and Zhenquan Tan\*

State Key Laboratory of Fine Chemicals, School of Petroleum and Chemical Engineering, Dalian University of Technology, 2 Dagong Road, Liaodongwan New District, Panjin 124221, Liaoning, China

### Corresponding Author

\*E-mail: tanzq@dlut.edu.cn

**Fig. S1** XRD patterns of ZIF-67 and NiCo-LDH.

**Fig. S2** SEM and TEM image of NiCo-LDH.

**Fig. S3** SEM image of NiCo<sub>2</sub>S<sub>4</sub> counterpart.

**Fig. S4** Line-scan elemental profile of a NiCo<sub>2</sub>S<sub>4</sub>@MoS<sub>2</sub> dodecahedron

**Fig. S5** N<sub>2</sub> adsorption–desorption isotherms of NiCo<sub>2</sub>S<sub>4</sub>@MoS<sub>2</sub> heterostructures (a) and NiCo<sub>2</sub>S<sub>4</sub> counterpart (b).

**Fig. S6** (a) CV curves at different scan rates, (b) GCD curves at different current densities of the NiCo<sub>2</sub>S<sub>4</sub> counterpart.

**Fig. S7** CV curves of NiCo<sub>2</sub>S<sub>4</sub>@MoS<sub>2</sub> heterostructures and NiCo<sub>2</sub>S<sub>4</sub> counterpart at 5 mV/s.

**Fig. S8** The GCD curves of the first three cycles and last three cycles of NiCo<sub>2</sub>S<sub>4</sub>@MoS<sub>2</sub> heterostructures (a) and NiCo<sub>2</sub>S<sub>4</sub> counterpart (b).

**Fig. S9** CVs in the region of 0.05-0.15 V vs. RHE for NiCo<sub>2</sub>S<sub>4</sub>@MoS<sub>2</sub> heterostructures (a) and NiCo<sub>2</sub>S<sub>4</sub> counterpart (b).

**Fig. S10** Plots showing the extraction of the  $C_{dl}$  for NiCo<sub>2</sub>S<sub>4</sub>@MoS<sub>2</sub> heterostructures and NiCo<sub>2</sub>S<sub>4</sub> counterpart.

**Table S1** Comparison of catalytic parameters of different HER catalysts in alkaline

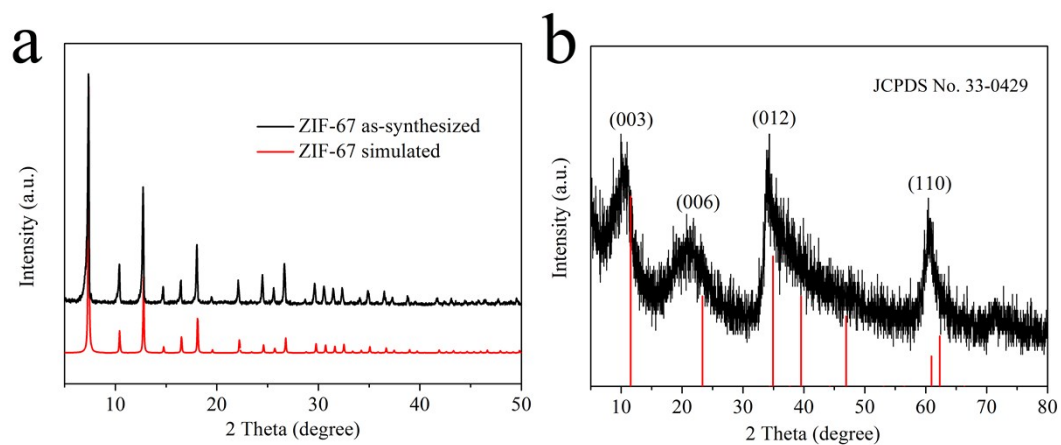

**Fig. S1** XRD patterns of ZIF-67 (a) and NiCo-LDH (b).

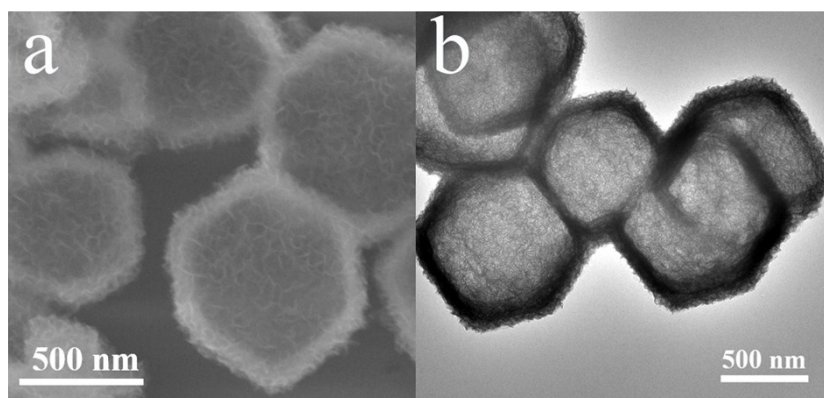

**Fig. S2** SEM (a) and TEM image (b) of NiCo-LDH.

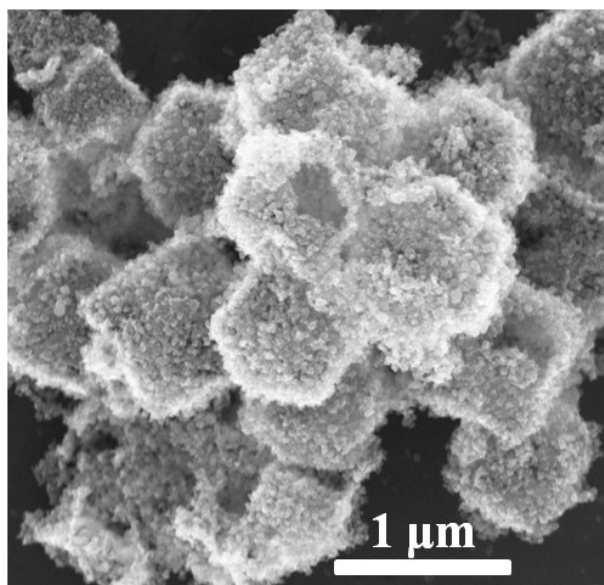

**Fig. S3** SEM image of NiCo<sub>2</sub>S<sub>4</sub> counterpart.

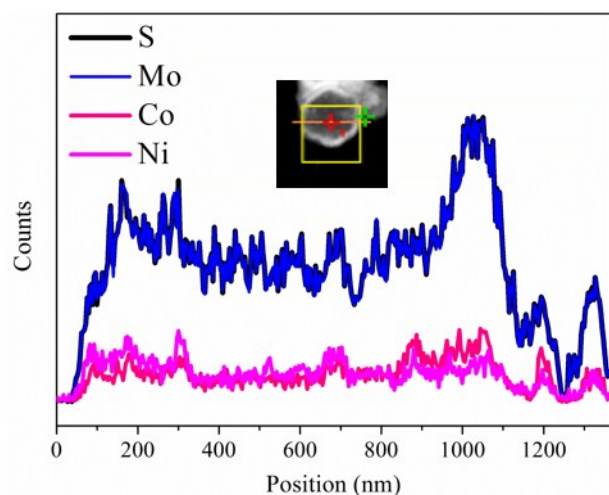

**Fig. S4** Line-scan elemental profile of a  $\text{NiCo}_2\text{S}_4@\text{MoS}_2$  dodecahedron

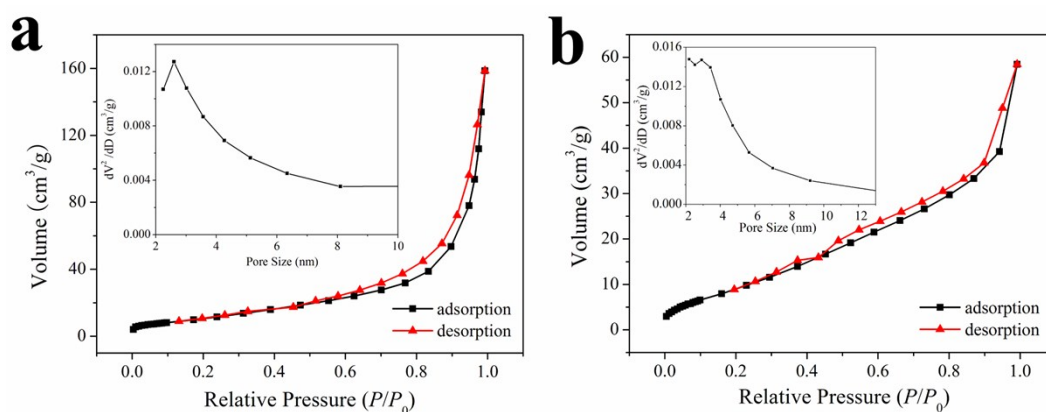

**Fig. S5**  $\text{N}_2$  adsorption–desorption isotherms of  $\text{NiCo}_2\text{S}_4@\text{MoS}_2$  heterostructures (a) and  $\text{NiCo}_2\text{S}_4$  counterpart (b). Insets: The pore diameter distribution

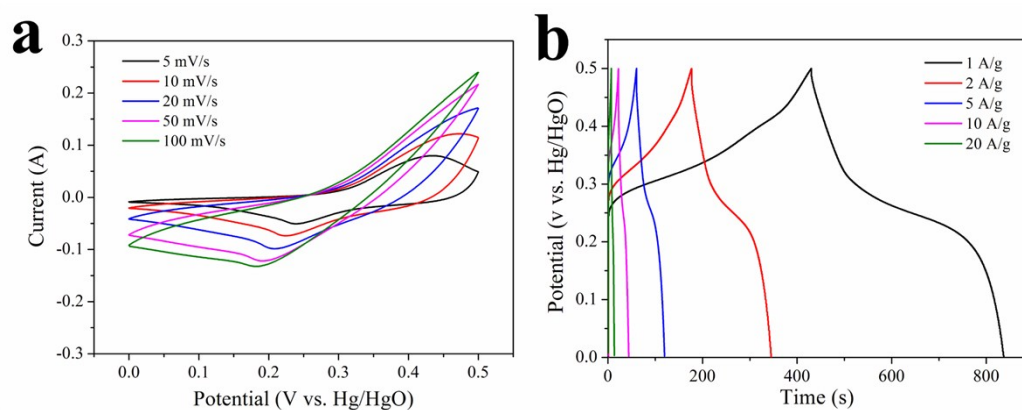

**Fig. S6** (a) CV curves at different scan rates, (b) GCD curves at different current densities of the  $\text{NiCo}_2\text{S}_4$  counterpart.

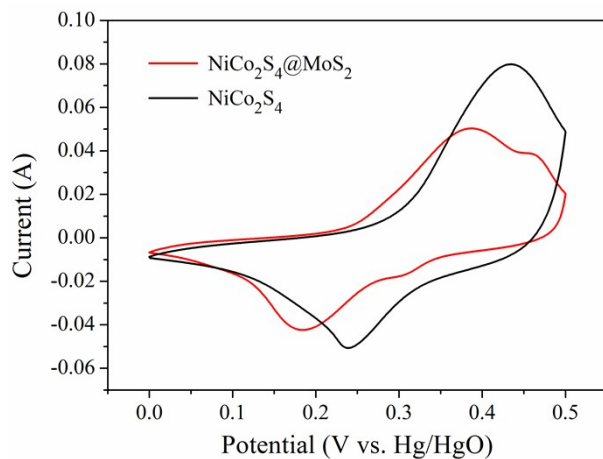

**Fig. S7** CV curves of NiCo<sub>2</sub>S<sub>4</sub>@MoS<sub>2</sub> heterostructures and NiCo<sub>2</sub>S<sub>4</sub> counterpart at 5 mV/s.

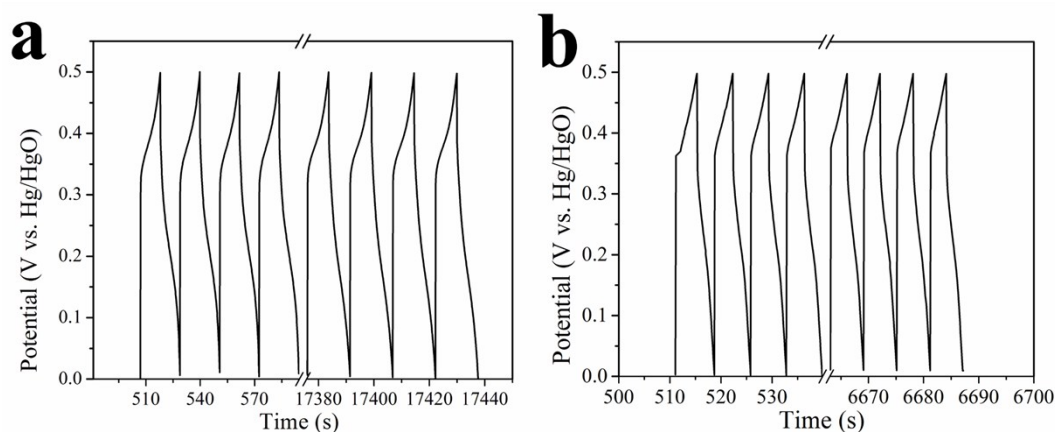

**Fig. S8** The GCD curves of the first three cycles and last three cycles of NiCo<sub>2</sub>S<sub>4</sub>@MoS<sub>2</sub> heterostructures (a) and NiCo<sub>2</sub>S<sub>4</sub> counterpart (b).

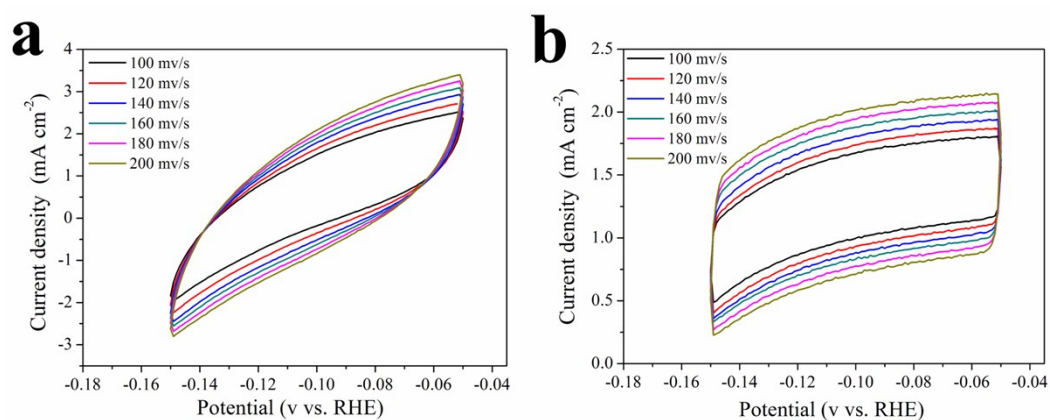

**Fig. S9** CVs in the region of 0.05-0.15 V vs. RHE for NiCo<sub>2</sub>S<sub>4</sub>@MoS<sub>2</sub> heterostructures (a) and NiCo<sub>2</sub>S<sub>4</sub> counterpart (b).

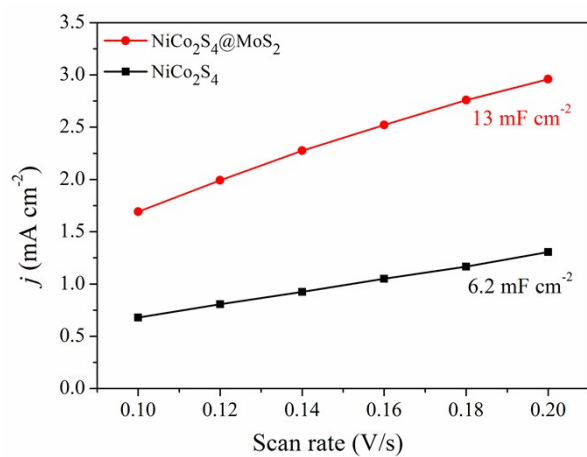

**Fig. S10** Plots showing the extraction of the  $C_{dl}$  for NiCo<sub>2</sub>S<sub>4</sub>@MoS<sub>2</sub> heterostructures and NiCo<sub>2</sub>S<sub>4</sub> counterpart.

**Table S1** Comparison of catalytic parameters of different HER catalysts in alkaline

| Catalyst                                                                   | Electrolyte | Potential for 10 mA cm <sup>-2</sup> (V vs. RHE) | Tafel slope (mV dec <sup>-1</sup> ) | Ref.                                   |
|----------------------------------------------------------------------------|-------------|--------------------------------------------------|-------------------------------------|----------------------------------------|
| Hollow NiCo <sub>2</sub> S <sub>4</sub> @MoS <sub>2</sub> heterostructures | 1 M KOH     | -0.194                                           | 62                                  | This work                              |
| MoS <sub>2</sub> /Co <sub>3</sub> S <sub>4</sub> hybrid hollow polyhedra   | 1 M KOH     | -0.225                                           | 115.3                               | Electrochim. Acta., 2018, 269, 262-273 |
| one-dimensional and hierarchical CoMoO-S/nickel foam (NF)                  | 1 M KOH     | -0.134                                           | 87                                  | J. Catal., 2018, 361, 204–213          |
| Co incorporated nanoboxes MoS <sub>2</sub>                                 | 1 M NaOH    | -0.221                                           | 102                                 | Electrochim. Acta , 2018, 276, 81-91   |
| CoS-Co(OH) <sub>2</sub> @aMoS <sub>2+x</sub> /NF                           | 1 M KOH     | -0.143                                           | 68                                  | Adv. Funct. Mater 2016, 26, 7386–7393  |
| NiS-Ni(OH) <sub>2</sub> @aMoS <sub>2+x</sub> /NF                           | 1 M KOH     | -0.226                                           | 81                                  |                                        |
| Co-MoS <sub>2</sub>                                                        | 1 M KOH     | -0.179                                           | 62                                  | ACS Nano 2018, 12, 4565-4573           |
